# Supplementary material
Source: PubMed Central journal article supplement (PMC1933404)
Supplement: 7601773s1.pdf [file 7601773s1.pdf]

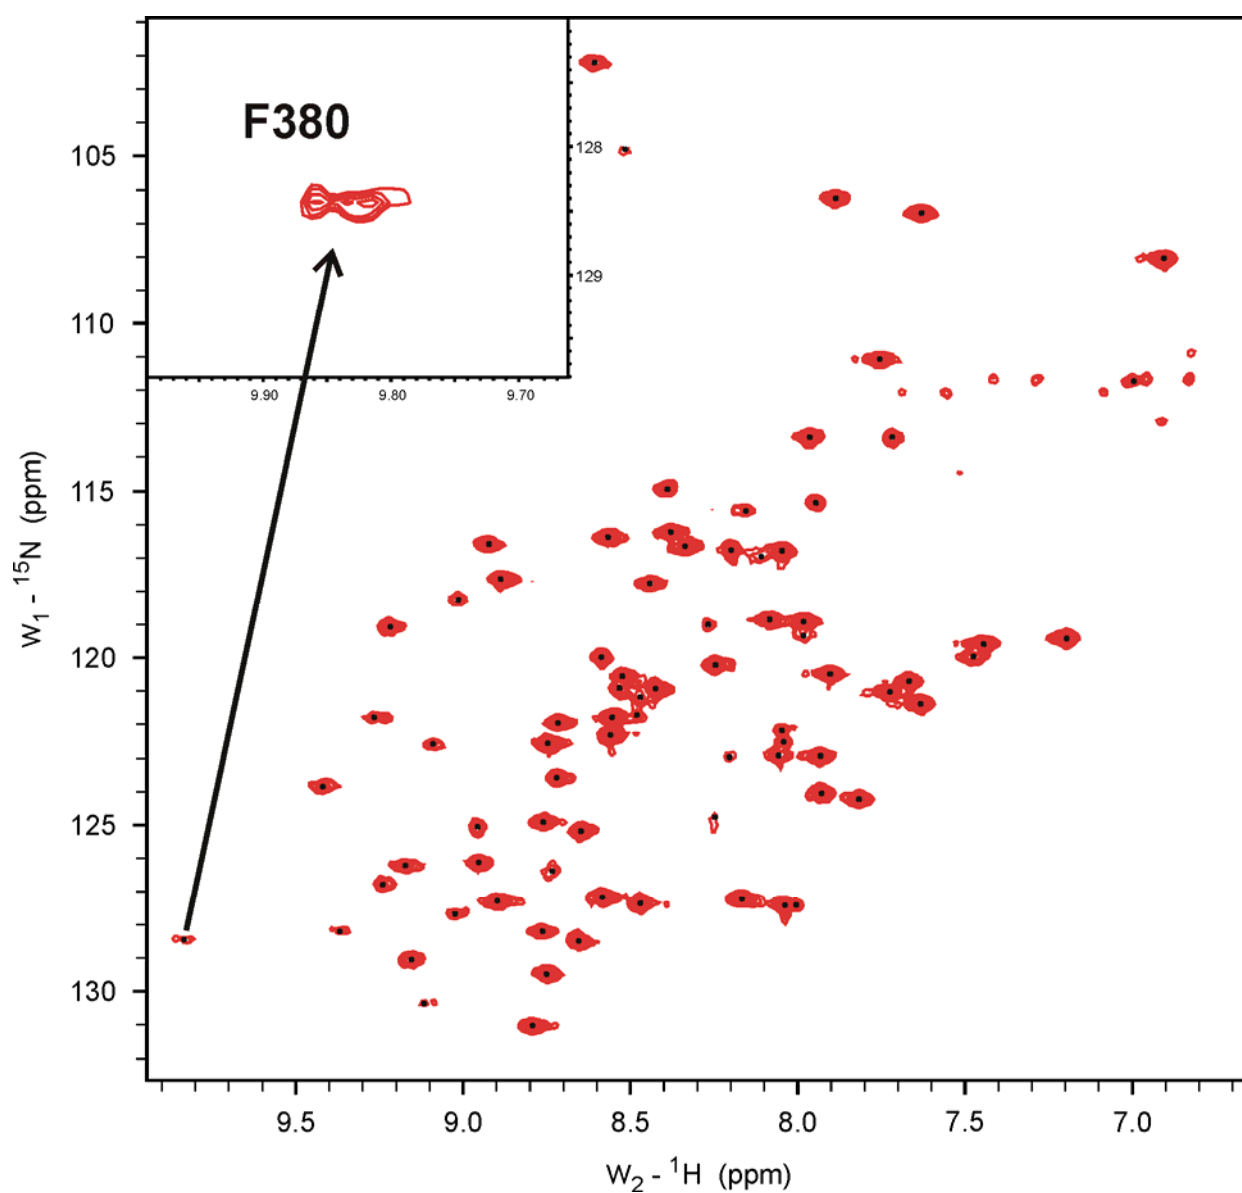

**Supplementary Figure S1** The [ ${}^{15}\text{N}$ ,  ${}^1\text{H}$ ]-TROSY spectrum of TBK1 ULD measured at 25°C. The sample contains ~0.1 mM TBK1-ULD, 50 mM Tris-HCl (pH=7.5), 150 mM NaCl, 50 mM Arg/Glu. The insert represents the peak assigned as Phe380 HN, which is affected by possible conformational exchange.

Ikeda et al., Supplementary Figure S2

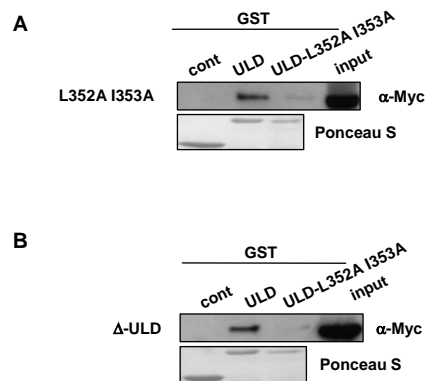

**Supplementary Figure S2** The ULD domain of TBK1 binds to TBK1 mutants. (**A, B**) Myc-tagged TBK1-L352A I353A (**A**) and  $\Delta$ -ULD (**B**) were introduced into HEK293T cells and total cell lysates were incubated with GST-ULD. After incubations with GST-control or GST-ULD proteins, the binding was examined by immunoblotting using  $\alpha$ -Myc antibody.

Ikeda et al., Supplementary Figure S3

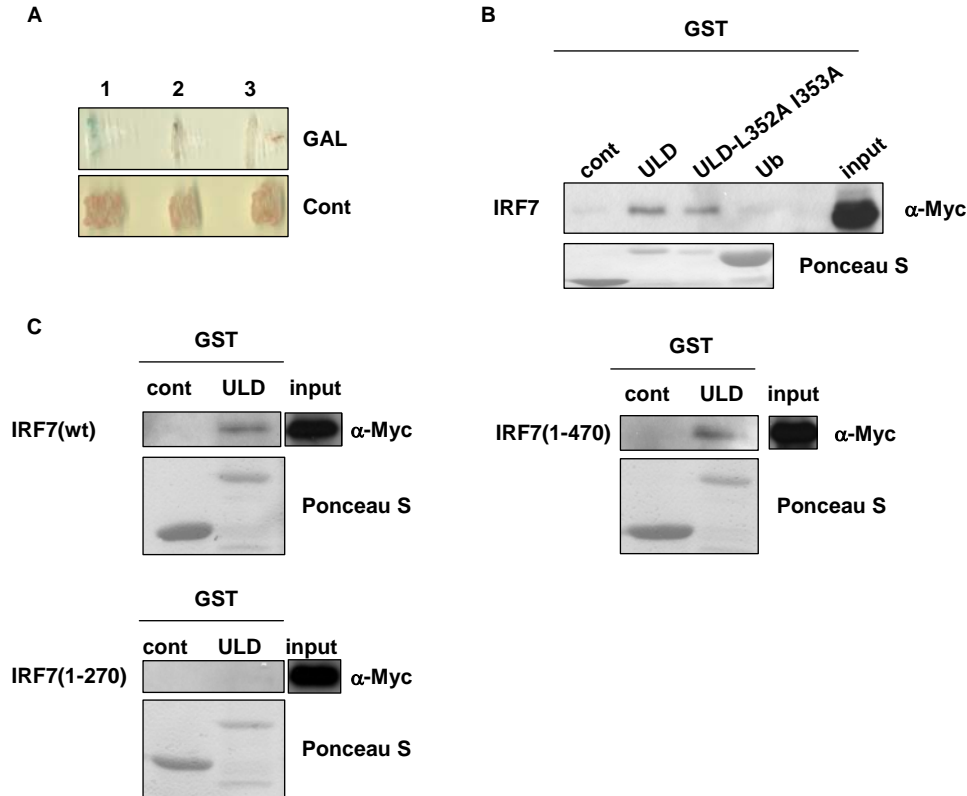

**Supplementary Figure S3** The ULD domain of TBK1 binds to IRF. **(A)** The direct interaction of IRF3 and TBK1-ULD was examined in yeast. TBK1-ULD in bait vector and IRF3 in prey vector were transformed in yeast and transformants were selected on -His-Leu plates. Selected colonies were re-streaked on -His-Leu plates or on GAL-substrate containing plates. After 48h, growth on -His-Leu plates and colors of yeast on GAL-containing plates were checked. (1; TBK1-ULD + IRF3, 2; TBK1-ULD + empty prey, 3; empty bait + IRF3) **(B)** Myc-IRF7 was transfected into HEK293T cells and cells were harvested for GST pull down assay. GST-ULD and GST-ULD-L352A I353A were incubated, washed with lysis buffer. Immunoblotting using  $\alpha$ -Myc antibody was performed. **(C)** Wt and deletion mutants of IRF7 were introduced into HEK293T cells. Total cell lysates were used for GST-pull down assay using GST-ULD. After the incubation of total cell lysates with GST-ULD, immunoblotting was performed.
